# Supplementary material for: 2D/3D heterostructure derived from phase transformation of 0D perovskite for random lasing applications with remarkably improved water resistance
Source: Royal Society of Chemistry journal article supplement (doi:10.1039/d1nr06084h), 2021-01-01
Supplement: d1nr06084h1.pdf [file d1nr06084h1.pdf]

Supporting Information for

**2D/3D Heterostructure Derived from Phase Transformation of 0D  
Perovskite for Random Lasing Applications with Remarkably improved  
Water Resistance**

Xun Sun,<sup>#</sup> Xinmin Shi,<sup>#</sup> Weiguang Zhang, Baoyuan Xu, Zhenhua Gao, Zifei Wang, Xue Wang, and  
Xiangeng Meng\*

School of Materials Science & Engineering, Qilu University of Technology (Shandong Academy of Sciences), Jinan,  
250300, China

E-mail: [mengxiangeng@gmail.com](mailto:mengxiangeng@gmail.com)

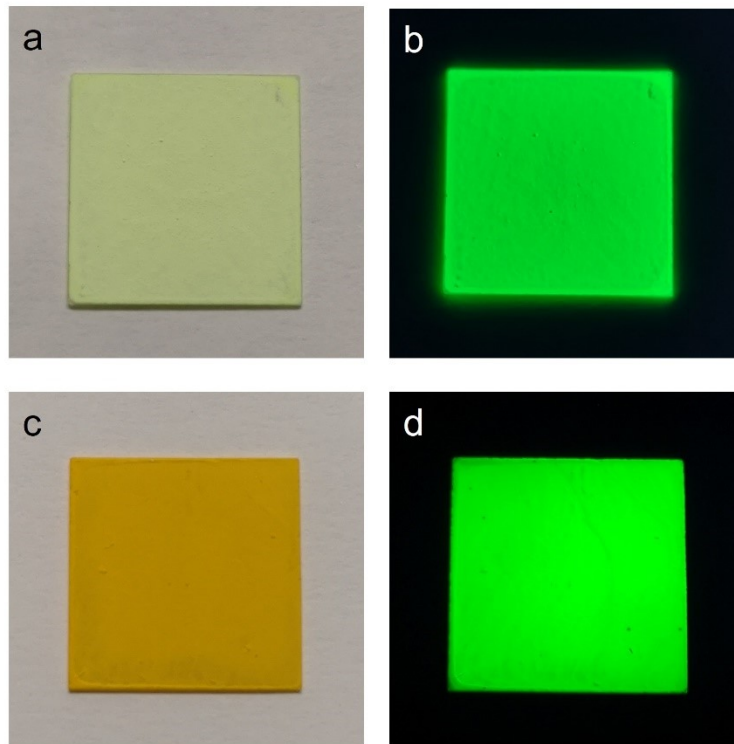

**Figure S1.** Photographs of perovskite films fabricated by drop casting  $\text{Cs}_4\text{PbBr}_6$  NCs (a, b) and  $\text{CsPb}_2\text{Br}_5/\text{CsPbBr}_3$  NCs (c, d) on glass substrates: illuminated by room lamp (a, c) and UV lamp (b, d) at 365 nm.

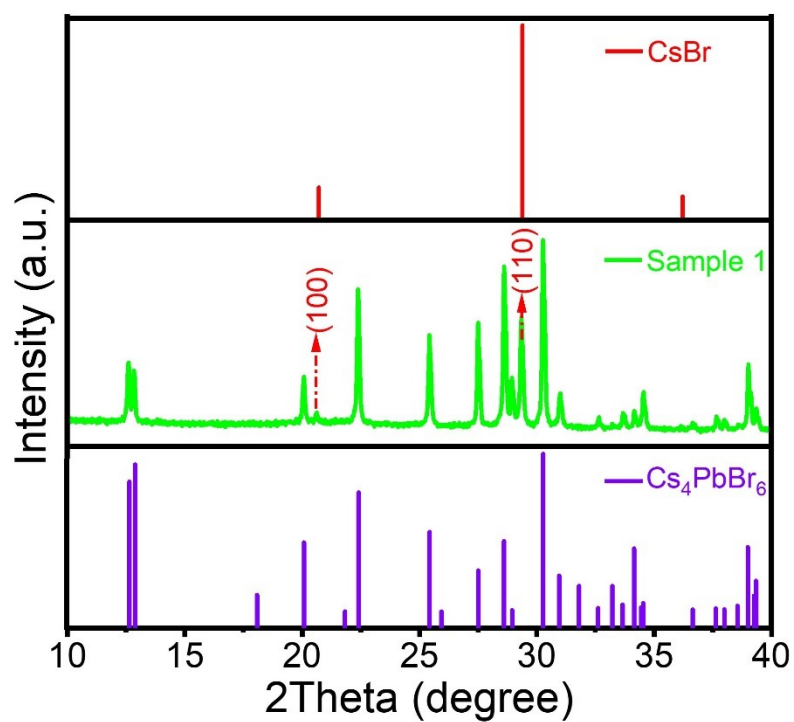

**Figure S2.** XRD patterns of  $\text{Cs}_4\text{PbBr}_6$  NCs. The standard patterns of CsBr and  $\text{Cs}_4\text{PbBr}_6$  are introduced for comparison. Residual phase of CsBr can be clearly identified in the developed  $\text{Cs}_4\text{PbBr}_6$  NCs.

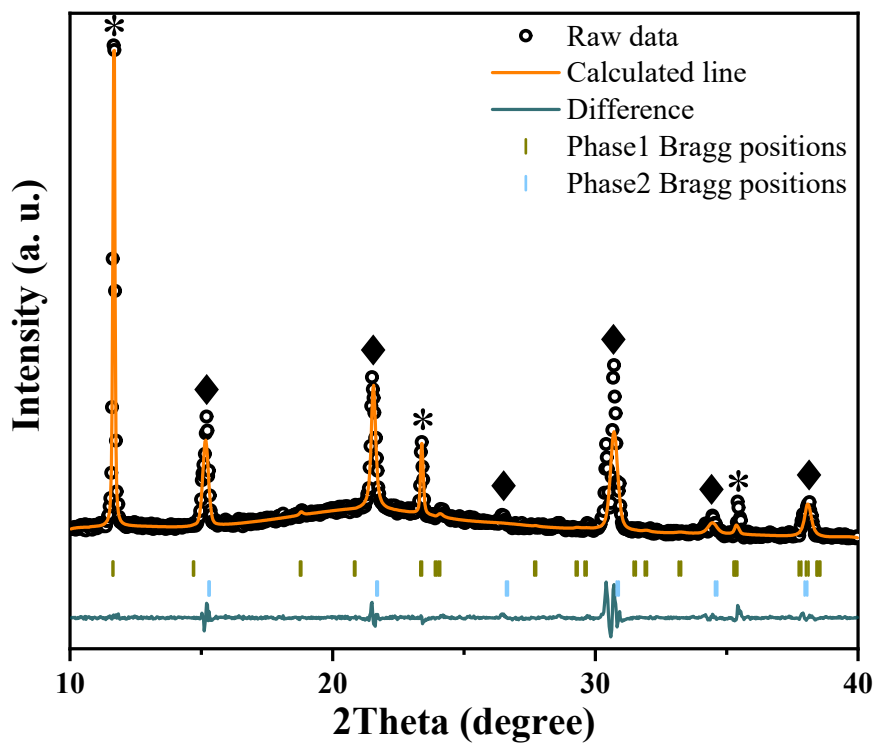

**Figure S3.** XRD refinement of the XRD pattern of the developed 2D/3D heterostructure. The results are fitted with the GSAS software, indicating that the molar ratio of  $\text{CsPb}_2\text{Br}_5$  to  $\text{CsPbBr}_3$  is approximately 3:7. The  $\text{CsPbBr}_3$  phase is marked with the stars, while the  $\text{CsPb}_2\text{Br}_5$  phase is marked with diamonds.

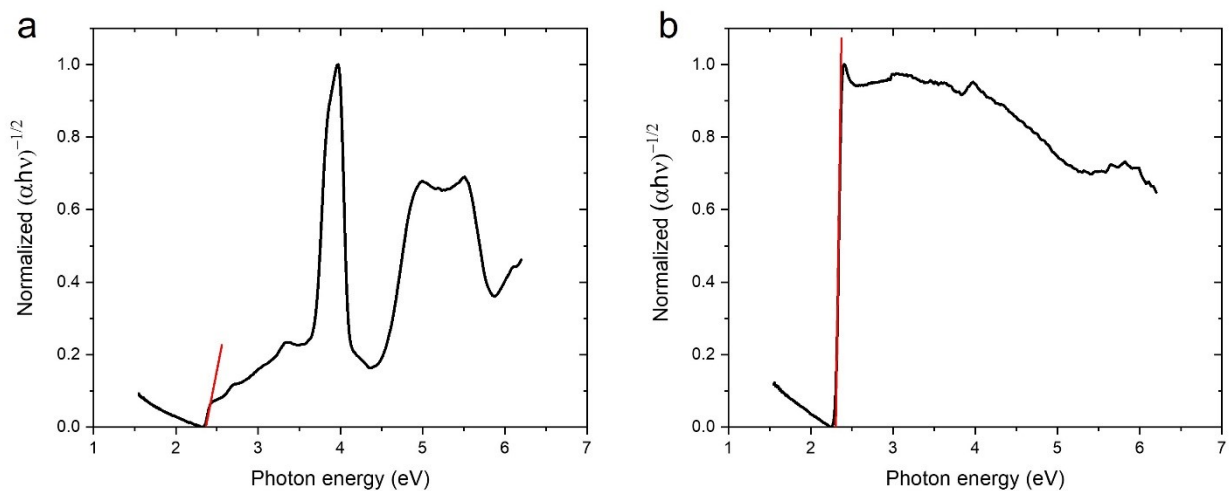

**Figure S4.** Determine optical bandgap via Tauc plot of  $\text{Cs}_4\text{PbBr}_6$  (a) and  $\text{CsPb}_2\text{Br}_5/\text{CsPbBr}_3$  (b). The Tauc relation is described with  $(\epsilon h\nu)^{1/n} = C(h\nu - E_g)$ , where  $\epsilon$  is the molar extinction coefficient,  $h$  is the Plank constant,  $\nu$  is the frequency,  $C$  is a constant,  $E_g$  is the bandgap. Here,  $n = 2$  is taken for  $\text{Cs}_4\text{PbBr}_6$  since  $\text{Cs}_4\text{PbBr}_6$  is usually viewed as indirect allowed transition, while  $n = 1$  is taken for  $\text{CsPb}_2\text{Br}_5/\text{CsPbBr}_3$  since  $\text{CsPbBr}_3$  is generally thought as direct bandgap semiconductor. The black curves are experimental data, while the red lines are tangents. The crossover of the tangents with the x axis determines the optical bandgap.

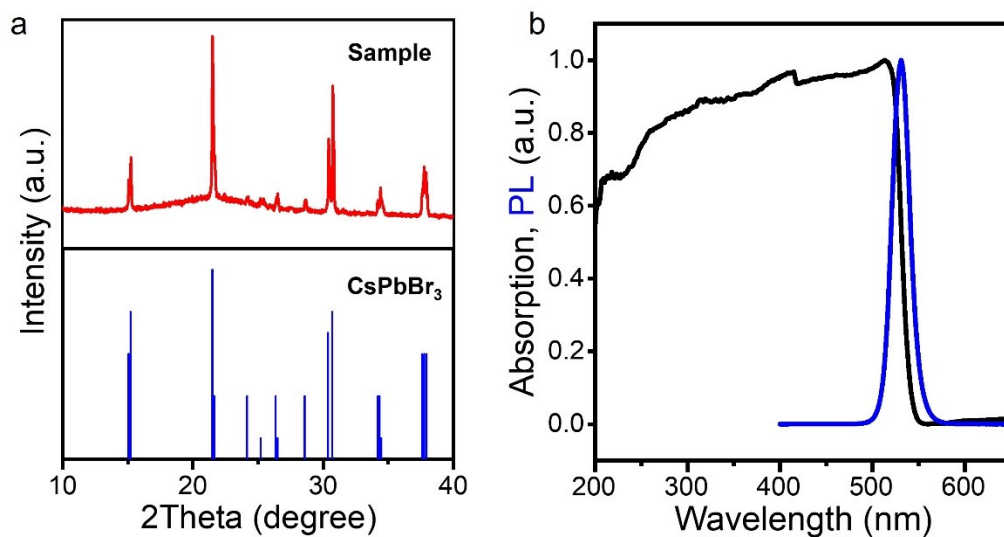

**Figure S5.** (a) XRD pattern of the obtained CsPbBr<sub>3</sub> product upon phase transformation Cs<sub>4</sub>PbBr<sub>6</sub> when exposed to methanol. The standard pattern of CsPbBr<sub>3</sub> is presented for comparison. (b) Optical absorption (black) and photoluminescence (red) spectra of the obtained CsPbBr<sub>3</sub> product.

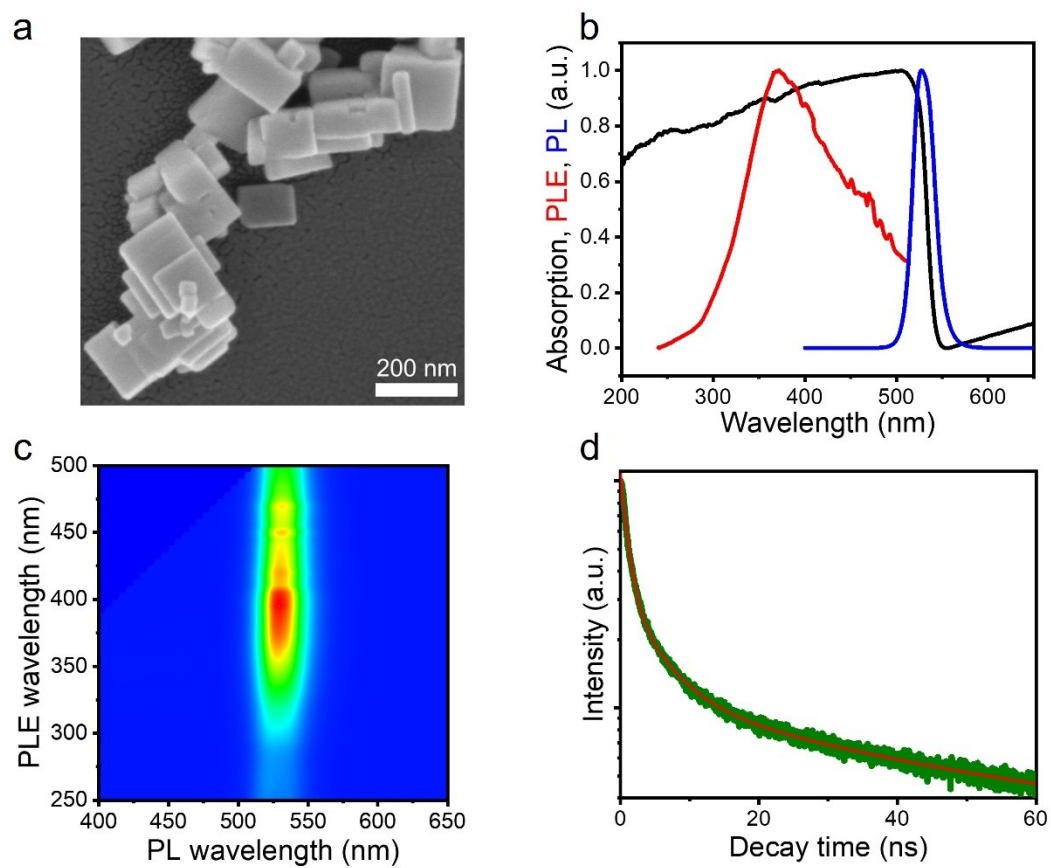

**Figure S6.** Structural and optical characterizations of CsPbBr<sub>3</sub> NCs: (a) SEM image; (b) Optical absorption (black curve), PLE (red curve), and PL (blue curve) spectra; (c) 2D PLE-PL mapping; and (d) Transient-state PL spectrum: experimental (green) and triple exponential fit (red).

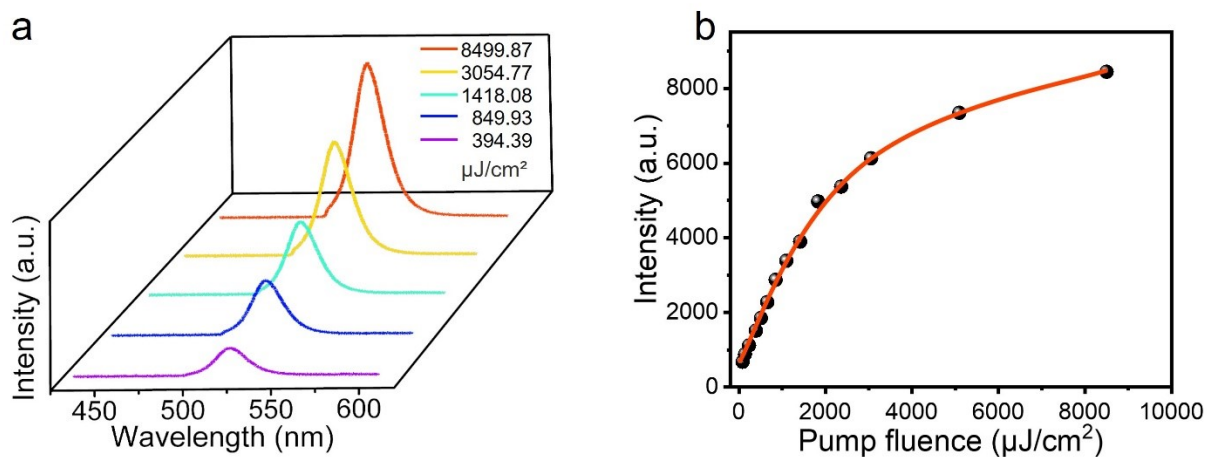

**Figure S7.** PL properties of  $\text{Cs}_4\text{PbBr}_6$  NC film upon optical pumping. (a) Evolution of the PL spectral profile with the pump fluence. (b) Plot of the PL intensity with the pump fluence. No spectral indicative of light amplification is observed.



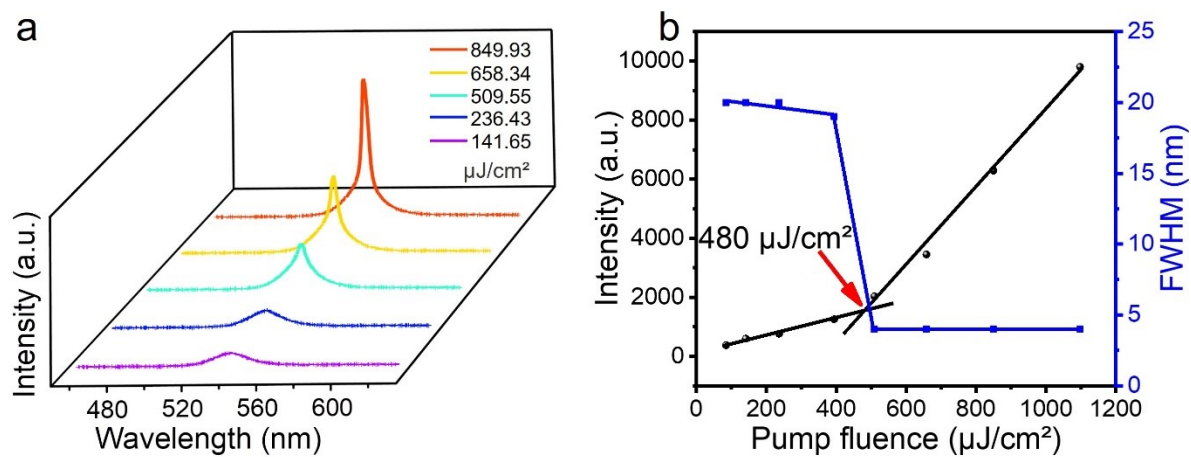

**Figure S8.** PL properties of the CsPb<sub>2</sub>Br<sub>5</sub>/CsPbBr<sub>3</sub> NC film after the first time water soaking. (a) Evolution of the PL spectral profile with the pump fluence. (b) Plot of the PL intensity with the pump fluence. The pump threshold is  $\sim 480 \mu\text{J}/\text{cm}^2$ .

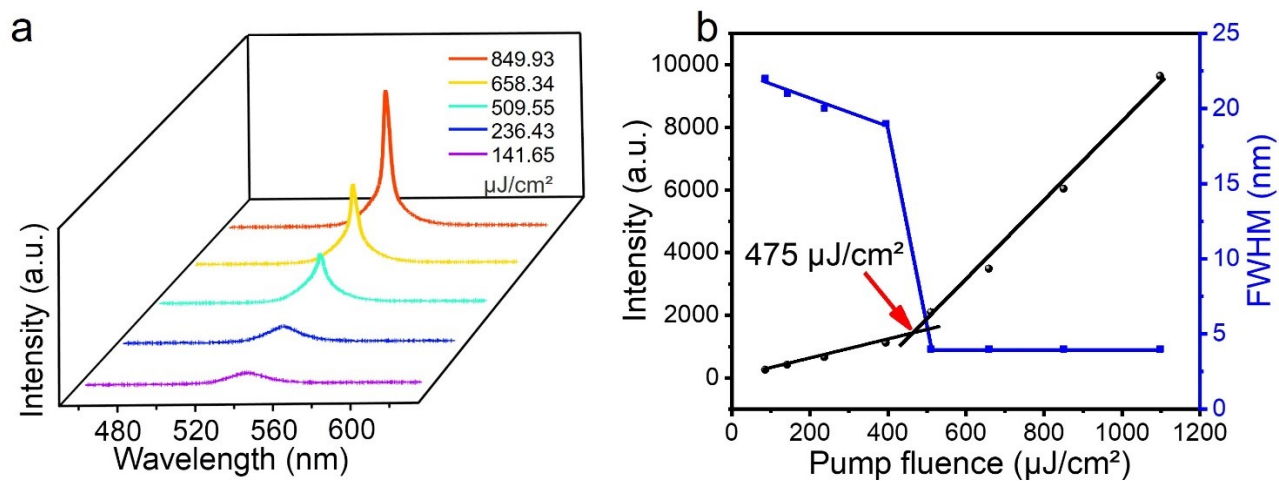

**Figure S9.** PL properties of the  $\text{CsPb}_2\text{Br}_5/\text{CsPbBr}_3$  NC film after the second time water soaking. (a) Evolution of the PL spectral profile with the pump fluence. (b) Plot of the PL intensity with the pump fluence. The pump threshold is  $\sim 475 \mu\text{J}/\text{cm}^2$ .

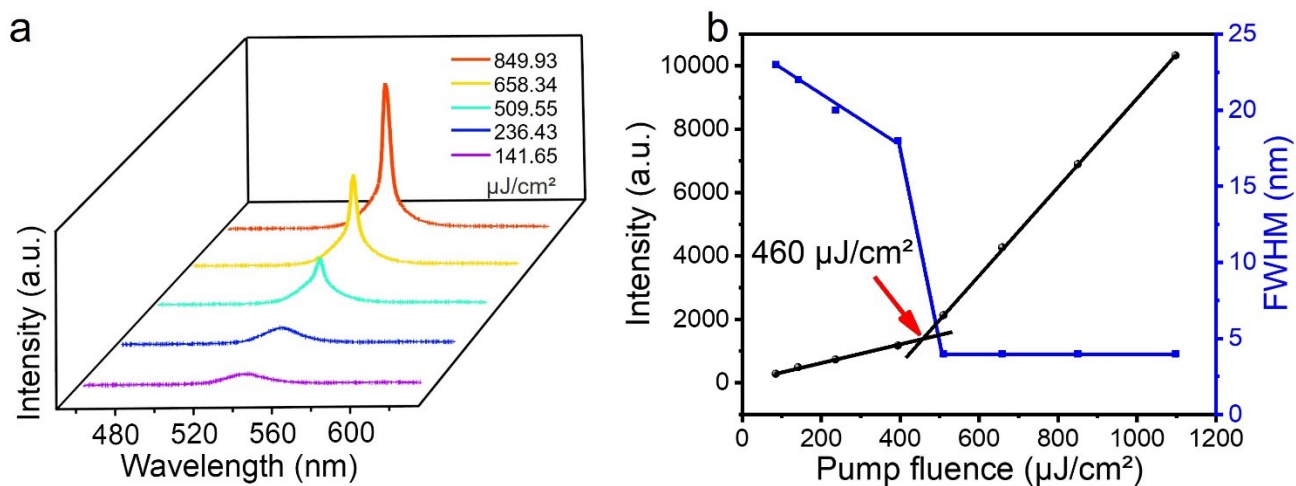

**Figure S10.** PL properties of the CsPb<sub>2</sub>Br<sub>5</sub>/CsPbBr<sub>3</sub> NC film after the third time water soaking. (a) Evolution of the PL spectral profile with the pump fluence. (b) Plot of the PL intensity with the pump fluence. The pump threshold is  $\sim 460 \mu\text{J}/\text{cm}^2$ .

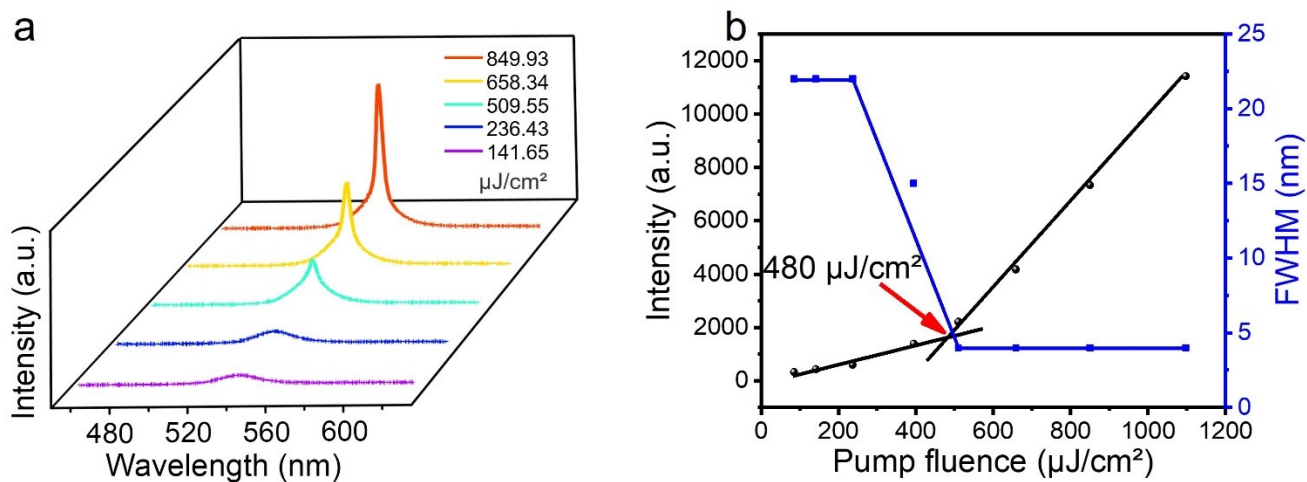

**Figure S11.** PL properties of the CsPb<sub>2</sub>Br<sub>5</sub>/CsPbBr<sub>3</sub> NC film after the fourth time water soaking. (a) Evolution of the PL spectral profile with the pump fluence. (b) Plot of the PL intensity with the pump fluence. The pump threshold is  $\sim 480 \mu\text{J}/\text{cm}^2$ .

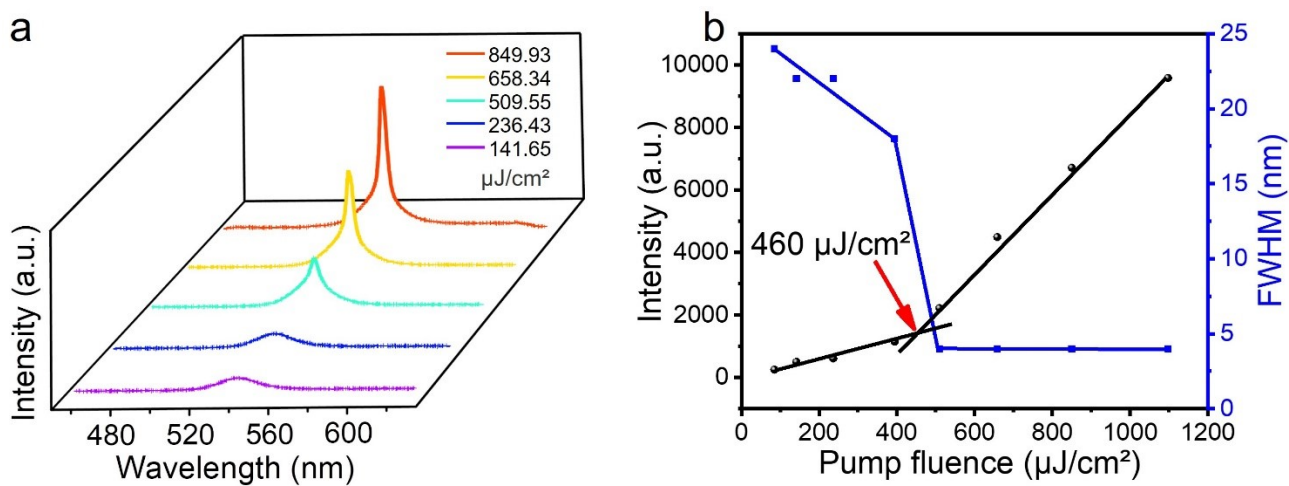

**Figure S12.** PL properties of the CsPb<sub>2</sub>Br<sub>5</sub>/CsPbBr<sub>3</sub> NC film after the fifth time water soaking. (a) Evolution of the PL spectral profile with the pump fluence. (b) Plot of the PL intensity with the pump fluence. The pump threshold is  $\sim 460 \mu\text{J}/\text{cm}^2$ .
